# Supplementary material for: The impact of coexisting diabetes mellitus on clinical outcomes in patients with idiopathic membranous nephropathy: a retrospective observational study
Source: BMC Nephrol. 2020 Jun 12;21:224. doi: 10.1186/s12882-020-01878-7 (PMC7291707; doi:10.1186/s12882-020-01878-7)
Supplement: Supplementary file 5 — Additional file 5. [file 12882_2020_1878_MOESM5_ESM.pdf]

## 病理诊断报告书

标本条码： 0137126028

医 院： 广东省人民医院-肾内科

病人姓名：

科 室： 肾内科一区

病理号： KB1737358

性 别： 男

房/床号： 29床

门诊/住院号： P771218

年 龄： 76 岁

接收时间： 2017-12-13 16:16:09

申请医生：

项目名称： 免疫荧光15项

医生电话： 83827812-61421

送检材料： 肾脏组织

患者电话：

临床诊断： 肾病综合征：膜性肾病？

## 大体描述：

- 1：中性甲醛固定的条索状灰白色组织一条，长约（1.3cm）取一盒全用作光镜检查；
- 2：荧光保存液固定的条索状灰白色组织一条，长约（0.3cm）取一盒全用作免疫荧光检查；
- 3：中性戊二醛固定的条索状灰黄组织一条，长约（0.1cm）取一盒全用作电镜检查。

## 镜下描述（主要病变）：

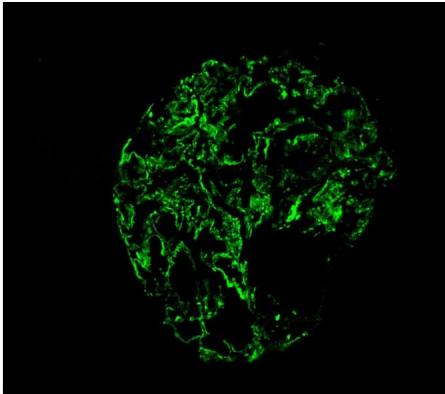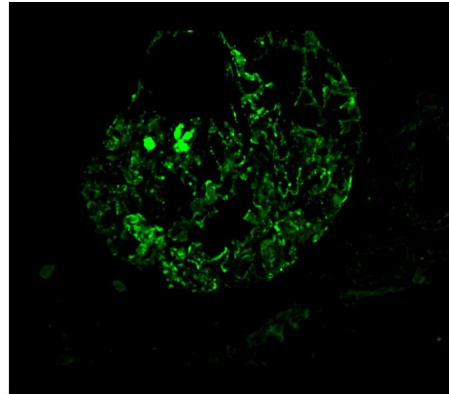

## 诊断意见：

免疫荧光： IgG1：+， IgG2：+， AA：阴性， Fib：阴性， ALB：肾小管可见重吸收的小滴， IgG1：阴性， IgG2：阴性， IgG3：+， IgG4：+++， PLA2R：+， HBsAg：阴性， HBcAg：阴性， HBeAg：阴性， C4d：球（+）， THSD7a：阴性。

## 肾活检病理检查报告书

标本条码： 0137126028 医院： 广东省人民医院-肾内科  
病人姓名： 科室： 肾内科一区 病理号： KB1737358  
性别： 男 房/床号： 29床 门诊/住院号P771218  
年龄： 76 岁 接收日期： 2017-12-13 16:16:09 申请医生：  
项目名称： 常规肾脏病理检查 医生电话： 83827812-61421  
送检材料： 肾脏组织 患者电话：  
临床诊断： 肾病综合征：膜性肾病？

## 大体描述：

- 1：中性甲醛固定的条索状灰白色组织一条，长约（1.3cm）取一盒全用作光镜检查；
- 2：荧光保存液固定的条索状灰白色组织一条，长约（0.3cm）取一盒全用作免疫荧光检查；
- 3：中性戊二醛固定的条索状灰黄组织一条，长约（0.1cm）取一盒全用作电镜检查。

## 光镜描述

送检肾穿刺组织常规做HE、PAS、PASM、Masson染色，主要为肾皮质，可见21个肾小球，其中5个肾小球球性硬化，1个肾小球节段性硬化。

其余肾小球系膜细胞和基质中-重度弥漫性增生，以系膜基质增生更为明显，部分毛细血管腔狭窄，部分毛细血管襻血管瘤样扩张，少数肾小球系膜区呈结节状改变，可见K-W结节形成，基底膜显增厚，可见少量钉突样结构，上皮下可见嗜复红蛋白沉积，壁层上皮细胞无增生，未见新月体形成，部分肾小球球囊周可见纤维化。

肾小管上皮颗粒及空泡变性，可见少量蛋白管型，多灶状及片状萎缩（萎缩面积约60%），肾间质多灶状及片状炎症细胞浸润伴纤维化，小动脉管壁增厚，细动脉玻璃样变，管腔狭窄。

## 免疫荧光： 肾小球数 4 个

抗体种类：

IgG: +++ IgM: + IgA: 阴性 C3: ++ C1q: 阴性

沉积部位：弥漫、球性、毛细血管襻

沉积方式：细颗粒状

## 病理诊断：

综合光镜、免疫荧光及电镜检查：

- 1、符合结节性糖尿病肾小球硬化症；
- 2、符合 期膜性肾病。

The manifestation of light microscope, immunofluorescence and electron microscope supported the diagnosis of nodular diabetic glomerulosclerosis and membranous nephropathy stage II.

本检测仅对来样负责。如果对结果有疑义，请在收到结果后7个工作日内与我们联系，多谢合作！

报告医师：

审核：

报告日期： 2017-12-15 13:13:30

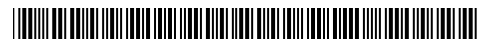

GZ17915158743727

## 肾活检病理检查报告书图片页

标本条码： 0137126028

医 院： 广东省人民医院-肾内科

病理号： KB1737358

病人姓名：

门诊/住院号 P771218

性 别： 男

科 室： 肾内科一区

房/床号： 29床

年 龄： 76 岁

接收日期： 2017-12-13 16:16:09

申请医生：

项目名称： 常规肾脏病理检查

医生电话： 83827812-61421

送检材料： 肾脏组织

患者电话：

临床诊断： 肾病综合征：膜性肾病？

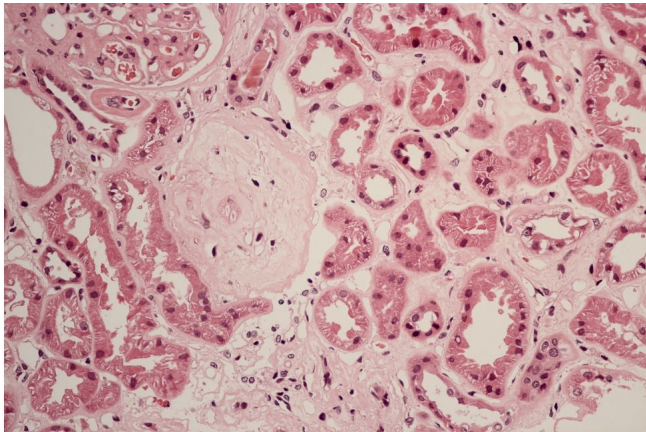

HE见硬化的肾小球

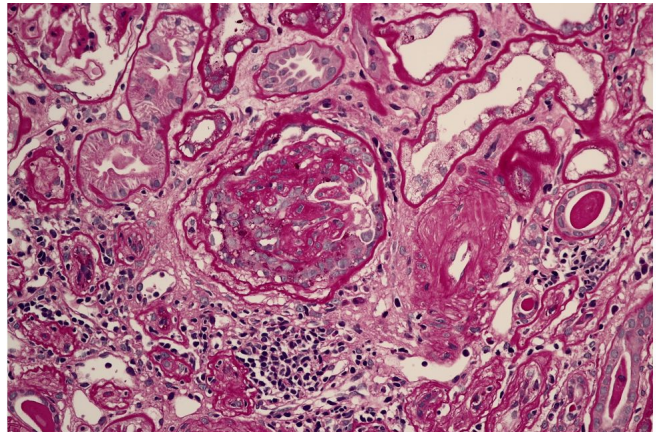

PAS见节段性硬化的肾小球

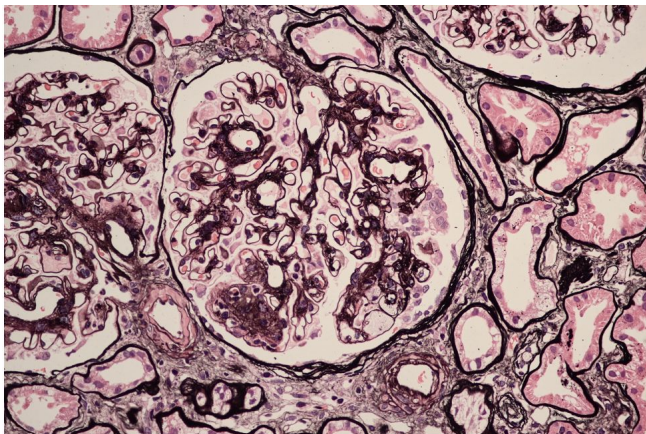

PASM见基底膜增厚，可见少量钉突样结构

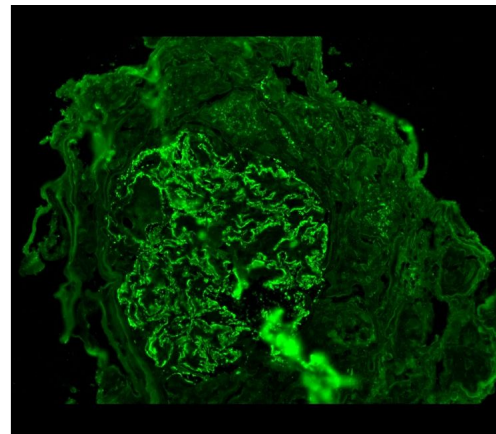

免疫荧光见IgG沉积

本检测为科研检测且仅对来样负责。如果对结果有疑义，请在收到结果后7个工作日内与我们联系，多谢合作！

报告医师：

主检实验室：广州金域

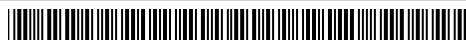

GZ17915158743727

报告日期： 2017-12-15 13:13:30

## 肾活检病理检查电镜报告书

|                  |                          |                     |
|------------------|--------------------------|---------------------|
| 标本条码：0137126028  | 医院：广东省人民医院-肾内科           | 病理号：KB1737358       |
| 病人姓名：            | 科室：肾内科一区                 | 门诊/住院号 P771218      |
| 性别：男             | 房/床号：29床                 | 申请医生：               |
| 年龄：76岁           | 接收日期：2017-12-13 16:16:09 | 医生电话：83827812-61421 |
| 项目名称：普通透射电镜检查与诊断 |                          | 患者电话：               |
| 送检材料：肾脏组织        |                          | 医院标识：               |
| 临床诊断：肾病综合征：膜性肾病？ |                          |                     |

## 大体描述：

- 1：中性甲醛固定的条索状灰白色组织一条，长约（1.3cm）取一盒全用作光镜检查；
- 2：荧光保存液固定的条索状灰白色组织一条，长约（0.3cm）取一盒全用作免疫荧光检查；
- 3：中性戊二醛固定的条索状灰黄组织一条，长约（0.1cm）取一盒全用作电镜检查。

## 电镜描述：

肾小球：镜下检测到1个肾小球。毛细血管内皮细胞明显空泡变性，个别管腔内可见红细胞聚集，无明显内皮细胞增生，部分毛细血管襻受压，部分管腔狭窄。肾小囊壁层增厚、分层，壁层细胞空泡变性，无明显增生。

**基底膜：弥漫均质增厚**，厚度达1200nm。

脏层上皮细胞：上皮细胞肿胀，空泡变性。足突弥漫融合。

上皮、基底膜内多量电子致密物沉积。

系膜区：系膜细胞和基质增生，结节形成。

未见电子致密物沉积。

肾小管-间质：部分肾小管萎缩。肾间质胶原纤维增生伴淋巴、单个核细胞浸润。

肾间质血管：毛细血管管腔内见红细胞聚集，小动脉管壁增厚。

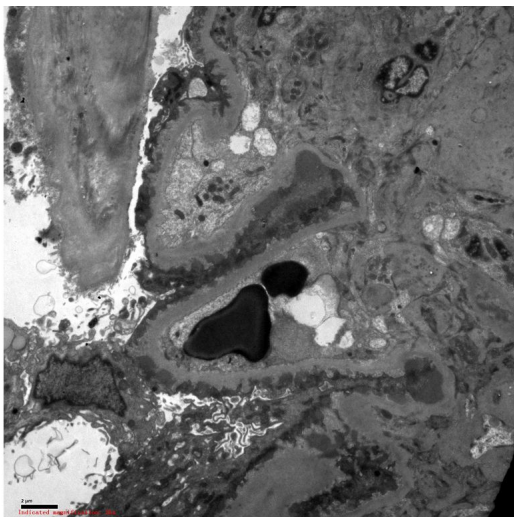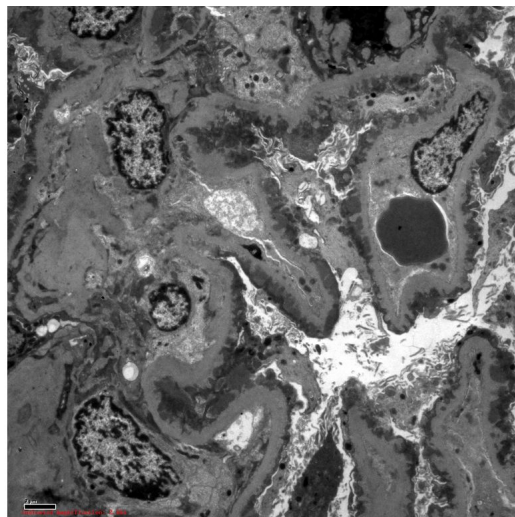

## 电镜诊断或印象：

综合光镜、免疫荧光及电镜检查：

- 1、符合**结节性糖尿病肾小球硬化症**；
- 2、符合**二期膜性肾病**。

本检测仅对来样负责。如果对结果有疑义，请在收到结果后7个工作日内与我们联系，多谢合作！

报告医师：

审核：

报告日期：2017-12-15 13:12:59

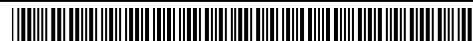

GZ17915158664245

The manifestation of light microscope, immunofluorescence and electron microscope supported the diagnosis of nodular diabetic glomerulosclerosis and membranous nephropathy stage II.
